# Supplementary material for: Analyse des explorations haptiques de formes pour la conception d'un dispositif de suppléance perceptive dédié aux personnes aveugles
Source: MDPI journal article supplement (doi:10.3390/foods10092028), 2006-02-01
Supplement: s1 [file s1]

# Analysis of Bovine Kappa-Casein Glycomacropeptide by Liquid Chromatography-Tandem Mass Spectrometry

Yun Yao Qu <sup>1,2</sup>, Bum Jin Kim <sup>2</sup>, Jeewon Koh <sup>2</sup> and David C. Dallas <sup>2,\*</sup>

<sup>1</sup>*Department of Food Science & Technology, Oregon State University, Corvallis, OR 97331*

<sup>2</sup>*Nutrition Program, School of Biological and Population Health Sciences, College of Public Health and Human Sciences, Oregon State University, Corvallis, OR 97331*

*\*To whom correspondence should be addressed: David C. Dallas, 118G Milam Hall, Corvallis, OR 97331. Tel.: 541-737- 1751.*

*E-mail address [dave.dallas@oregonstate.edu](mailto:dave.dallas@oregonstate.edu)*

**Conflict of interest statement:** The authors have declared no conflict of interest

**\*Corresponding author at** David C. Dallas; 118G Milam Hall, Corvallis, OR 97331; 541-737-1751; [dave.dallas@oregonstate.edu](mailto:dave.dallas@oregonstate.edu)

## Table of Content

FIGURE S1. MS/MS SPECTRA FOR INTACT ACMP WITH SEQUENCE A AND B. A) TANDEM MS SPECTRA FOR THE INTACT ACMP WITH SEQUENCE A, OBSERVED M/Z 1341.661, [M+5H]<sup>5+</sup>, SCAN TIME = 21.90 MIN FOUND IN THE CMP POWDER 2 SAMPLE. B) TANDEM MS SPECTRA FOR THE INTACT ACMP WITH SEQUENCE B, OBSERVED M/Z 1335.294[M+5H]<sup>5+</sup>, SCAN TIME = 22.23 MIN FOUND IN THE CMP POWDER 2 SAMPLE.....S-3

FIGURE S2. THE REPRESENTATIVE OXONIUM IONS IDENTIFIED FROM INTACT GCMP AND GCMP FRAGMENTS (GALNAC<sub>1</sub>GAL<sub>1</sub>NEUAC<sub>2</sub>). GLYCAN SYMBOLS: YELLOW SQUARE, N-ACETYL GALACTOSAMINE; YELLOW CIRCLE, GALACTOSE; AND PURPLE DIAMOND, N-ACETYL NEURAMINIC ACID..... S-4

FIGURE S3. ANNOTATED MS/MS SPECTRA FOR GCMP FRAGMENT WITH SEQUENCE A ONE O-GLYCAN. TANDEM MS SPECTRA FOR MAIPPKKNQDKTEIPTINTIASGEPTSTPTEAVESTVATLED + GALNAC<sub>1</sub>GAL<sub>1</sub>NEUAC<sub>2</sub> (M/Z 1369.159, Z=4) HAD A GLYCOSYLATION SITE AT THR154 IN THE CMP STANDARD SAMPLE. GLYCAN SYMBOLS: YELLOW SQUARE, N-ACETYL GALACTOSAMINE; YELLOW CIRCLE, GALACTOSE; AND PURPLE DIAMOND, N-ACETYL NEURAMINIC ACID.....S-5

FIGURE S4. ANNOTATED MS/MS SPECTRA FOR ACMP FRAGMENT WITH SEQUENCE A WITH PHOSPHORYLATION. TANDEM MS SPECTRA FOR DSPEVIESPPEINTVQVTSTAV (M/Z 2276.082, Z=2) HAD A PHOSPHORYLATION SITE AT SER170 FOUND IN CMP POWDER 1 SAMPLE.....S-6

FIGURE S5. ANNOTATED MS/MS SPECTRA FOR INTACT GCMP WITH SEQUENCE A CONTAINING TRISACCHARIDE O-GLYCAN. TANDEM MS SPECTRA FOR THE INTACT GCMP WITH SEQUENCE B CONTAINING ONE O-GLYCAN (GALNACGALNEUAC) AND ONE PHOSPHATE, OBSERVED M/Z 1488.924 [M+5H]<sup>5+</sup>, SCAN TIME = 21.68 MIN FOUND IN THE CMP STANDARD SAMPLE. GLYCAN SYMBOLS: YELLOW SQUARE, N-ACETYL GALACTOSAMINE; YELLOW CIRCLE, GALACTOSE; AND PURPLE DIAMOND, N-ACETYL NEURAMINIC ACID.....S-7

TABLE S1. THE 51 INTACT CMPS FOUND IN THE FOUR SAMPLES WITH PEPTIDE SEQUENCE, NUMBER OF PHOSPHORYLATIONS, NUMBER OF OXIDATIONS, NUMBER OF O-GLYCOSYLATIONS, GLYCAN STRUCTURE, OBSERVED MASS, CALCULATED MASS AND ERROR PPM.....S-8

TABLE S2. THE 159 CMP FRAGMENTS FOUND IN THE FOUR SAMPLES WITH PEPTIDE SEQUENCE, NUMBER OF PHOSPHORYLATIONS, NUMBER OF OXIDATIONS, NUMBER OF O-GLYCOSYLATIONS, GLYCAN STRUCTURE OBSERVED MASS, CALCULATED MASS AND ERROR PPM.....S-8

TABLE S3. THE COUNTS OF INTACT GCMP CONTAINING 1, 2 AND 3 O-GLYCANS IDENTIFIED IN THE FOUR SAMPLES (CMP STD, CMP POWDER 1, CMP POWDER 2 AND WPI).....S-8



| <i>m/z</i> [M+H] <sup>+</sup> | Composition                                             | Structure                                                                                                                                                                                                                                                                                                                                                                                                                                                                                                                          |
|-------------------------------|---------------------------------------------------------|------------------------------------------------------------------------------------------------------------------------------------------------------------------------------------------------------------------------------------------------------------------------------------------------------------------------------------------------------------------------------------------------------------------------------------------------------------------------------------------------------------------------------------|
| 168.065                       | GalNAc-36                                               |  -2H & -2OH                                                                                                                                                                                                                                                                                                                                                                                                                                       |
| 186.076                       | GalNAc-18                                               |  -H & -OH                                                                                                                                                                                                                                                                                                                                                                                                                                         |
| 204.087                       | GalNAc                                                  |                                                                                                                                                                                                                                                                                                                                                                                                                                                   |
| 274.092                       | NeuAc-18                                                |  -H & -OH                                                                                                                                                                                                                                                                                                                                                                                                                                         |
| 292.103                       | NeuAc                                                   |                                                                                                                                                                                                                                                                                                                                                                                                                                                   |
| 366.140                       | GalNAcGal                                               | <br>                                                                                                                                                                                                                                                                                                                                                             |
| 454.156                       | GalNeuAc                                                | <br>                                                                                                                                                                                                                                                                                                                                                             |
| 495.182                       | GalNAcNeuAc                                             | <br>                                                                                                                                                                                                                                                                                                                                                             |
| 639.225                       | GalNAcGalNeuAc-18                                       | <br> -H & -OH or <br> -H & -OH                                                                                                                                                                 |
| 657.235                       | GalNAcGalNeuAc                                          | <br><br> or <br>  |
| 948.330                       | Gal <sub>1</sub> NAcGal <sub>1</sub> NeuAc <sub>2</sub> | <br><br>                                                                                                                                                                               |

**Figure S2.** The representative oxonium ions identified from intact gCMPs and gCMP fragments (GalNAcGal, GalNAcGalNeuAc and GalNAc<sub>1</sub>Gal<sub>1</sub>NeuAc<sub>2</sub>). Glycan symbols: yellow square, N-acetyl galactosamine; yellow circle, galactose; and purple diamond, N-acetyl neuraminic acid.

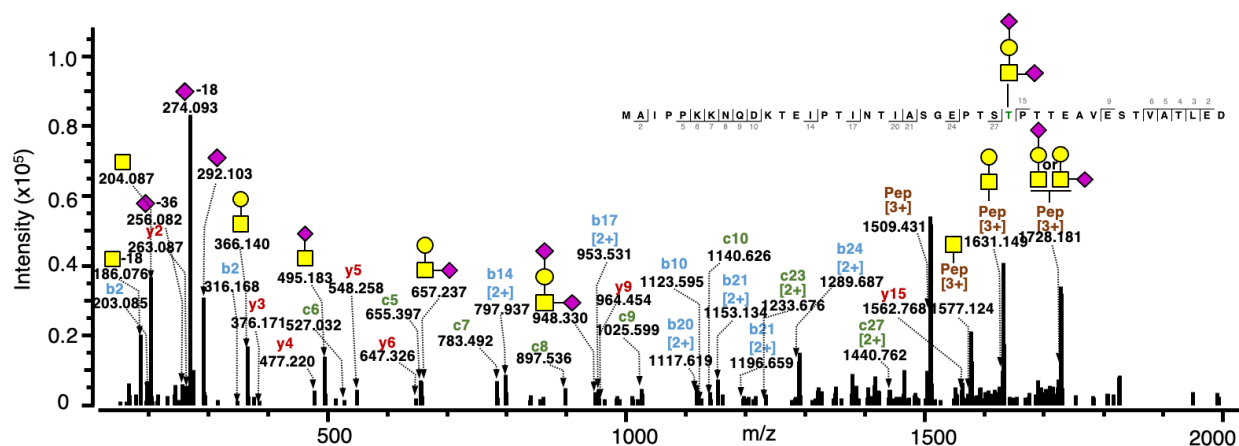

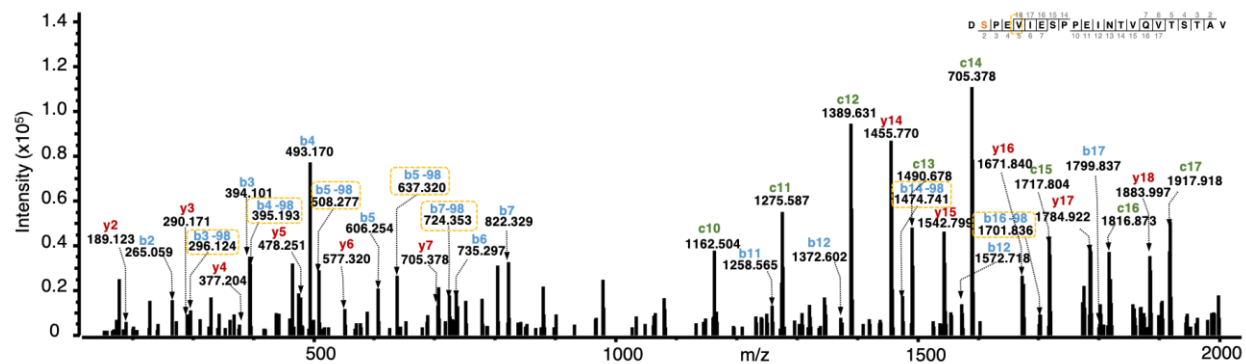

**Figure S4.** Annotated MS/MS spectra for aCMP fragment with sequence A with phosphorylation. Tandem MS spectra for DSPEVIESPPEINTVQVTSTAV (m/z 2276.082, z=2) had a phosphorylation site at Ser170 found in CMP powder 1 sample.

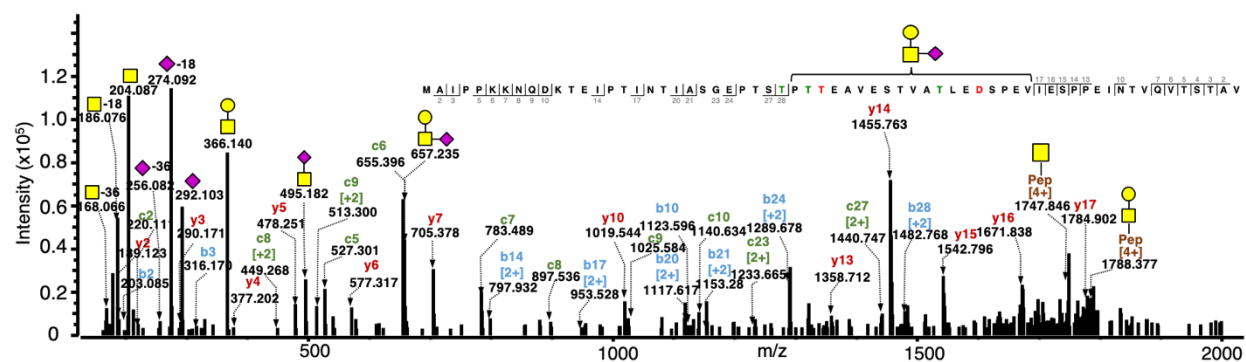

**Figure S5.** Annotated MS/MS spectra for intact gCMP with sequence A containing trisaccharide O-glycan. Tandem MS spectra for the intact gCMP with sequence B containing one O-glycan (GalNAcGalNeuAc) and one phosphate, observed  $m/z$  1488.924  $[M+5H]^{5+}$ , scan time = 21.68 min found in the CMP standard sample. Glycan symbols: yellow square, N-acetyl galactosamine; yellow circle, galactose; and purple diamond, N-acetyl neuraminic acid.

**Table S1.** The 51 intact CMPs found in the four samples with peptide sequence, number of phosphorylations, number of oxidations, number of O-glycosylations, glycan structure, observed mass, calculated mass and error ppm.

\*Excel S-1

**Table S2.** The 159 CMP fragments found in the four samples with peptide sequence, number of phosphorylations, number of oxidations, number of O-glycosylations, glycan structure observed mass, calculated mass and error ppm.

\*Excel S-2

**Table S3.** The counts of intact gCMP containing 1, 2 and 3 O-glycans identified in the four samples (CMP STD, CMP powder 1, CMP powder 2 and WPI).

|                     | CMP STD | CMP powder 1 | CMP powder 2 | WPI |
|---------------------|---------|--------------|--------------|-----|
| 1 <i>O</i> -glycan  | 17      | 18           | 18           | 18  |
| 2 <i>O</i> -glycans | 14      | 15           | 16           | 15  |
| 3 <i>O</i> -glycans | 9       | 8            | 9            | 9   |
